# Supplementary material
Source: PubMed Central journal article supplement (PMC3870665)
Supplement: 1315438110_pnas.201315438SI.pdf [file 1315438110_pnas.201315438SI.pdf]

# Supporting Information

Zu et al. 10.1073/pnas.1315438110

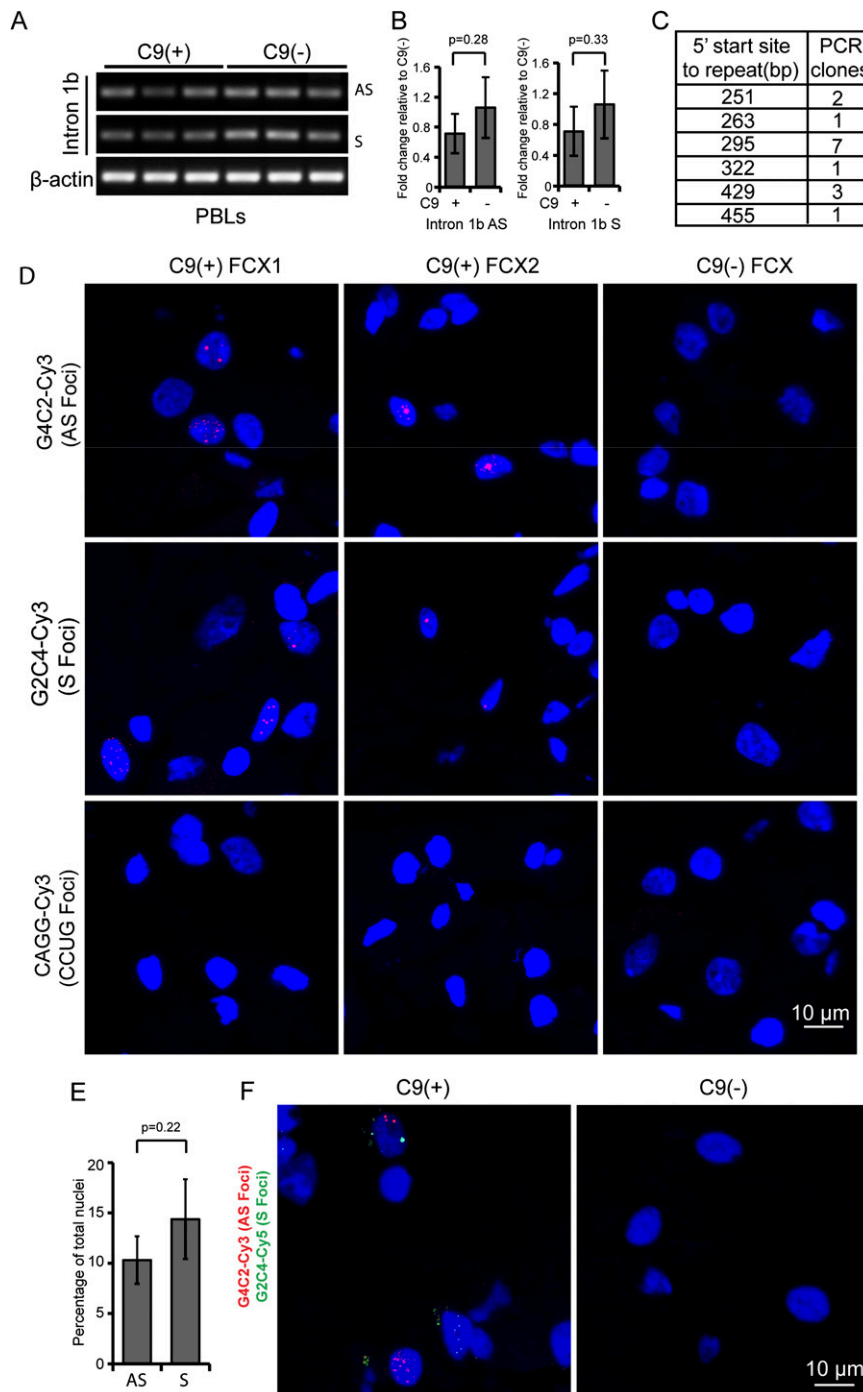

**Fig. S1.** (A) Strand-specific RT-PCR detection of intron 1b S and antisense (AS) transcripts of peripheral blood leukocytes (PBLs) of three *chromosome 9 ORF 72* (*C9ORF72*) expansion-positive [C9(+)] and three C9(-) controls. (B) Quantitative RT-PCR of intron 1b AS and S transcripts in C9(+) $(n = 3)$  and C9(-) $(n = 3)$  controls. (C) Summary of 5' RACE products. (D) FISH staining of frontal cortex (FCX) from two representative C9(+) $(n = 3)$  cases showing both sense ( $G_2C_4$ ) and antisense ( $G_4C_2$ ) RNA foci, detected by  $G_4C_2$ -Cy3 and  $G_2C_4$ -Cy3 probes, respectively. No similar staining was found in C9(-) FCX or using a CAGG-Cy3 control probe. (E and F) Double-labeling of C9(+) $(n = 3)$  FCX shows sense ( $G_2C_4$ -Cy3 probe, green) and antisense ( $G_4C_2$ -Cy3 probe, red) RNA foci are commonly found in different cells, and occasionally sense and antisense foci are found in the same cell (example of cells with sense, antisense, and both types of foci is shown as an example). No similar staining is found in C9(-) FCX tissue.

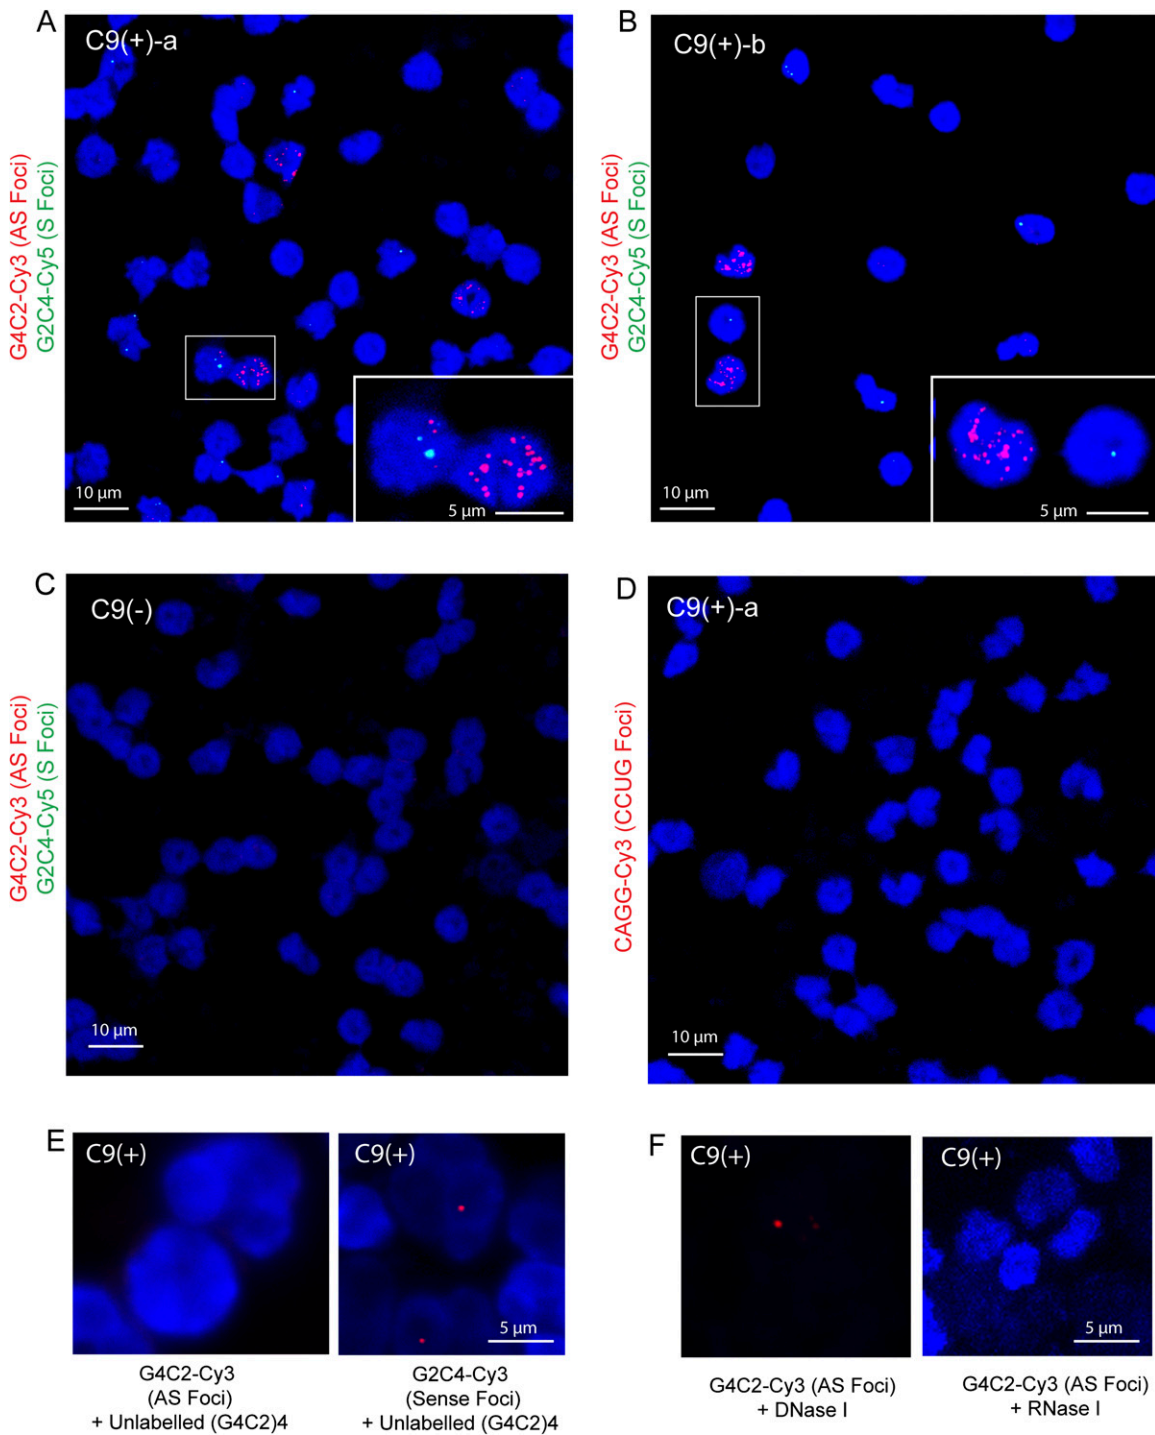

**Fig. S2.** FISH staining of PBLs showing the accumulation of antisense G<sub>2</sub>C<sub>4</sub> and sense G<sub>4</sub>C<sub>2</sub> RNA foci in C9(+) but not C9(-) cells. (A–C) Double-labeling of sense (G<sub>2</sub>C<sub>4</sub>-Cy5 probe, green) and antisense RNA (C<sub>4</sub>C<sub>2</sub>-Cy3 probe, red) RNA foci in cells from two C9(+) patients [C9(+)-a and C9(+)-b] but not C9(-) PBLs. (D) No similar staining was seen in C9(+) samples probed with a CAGG-Cy3 control probe. (E) Antisense foci specificity assay showing excess unlabeled (G<sub>4</sub>C<sub>2</sub>)<sub>4</sub> oligo blocks labeling of G<sub>4</sub>C<sub>2</sub>-Cy3 antisense but not G<sub>2</sub>C<sub>4</sub>-Cy3 labeled sense foci. (F) Additional controls for antisense RNA foci showing expected DNase I resistance and RNase I sensitivity.

G<sub>4</sub>C<sub>2</sub> (sense strand)

Sense frame 1 (GP<sub>S</sub>)

\*GPGPGPGPGPGPGPGP (GP)<sub>EXP</sub>GPGPGRGRGGPGGGPGAGLRLRCLRP  
RRRRRRWRVGE\*

Sense frame 2 (GR<sub>S</sub>)

\*RLTRRKQGGKQPQPVASSGTQESRARGRGRGRGRGRGRGRGR (GR)<sub>EXP</sub>GRGRGVV  
GAGPGAGPGRGCGCGACARGGGGAGGGGEVSEEAASWRVAVWGSAAAGKRRG\*

Sense frame 3 (GA<sub>S</sub>)

\*QALELRSRALGAGAGAGAGAGAGAGAGA (GA)<sub>EXP</sub>GAGAWSGRARGRARGGA  
AVAVPAPAAEAQAVASG\*

G<sub>2</sub>C<sub>4</sub> (antisense strand)

Antisense frame 1 (PA<sub>AS</sub>)

\*GEPPLLPAPLPGSRTPNSHPPGCRLLTHPLATACASAAAGAGTATAAPPRARPRARPDHAPAPA  
PAPAPAPAPAPAPA (PA)<sub>EXP</sub>PAPAPARSARLLSSRACYRLRLFSLFSSG\*

Antisense frame 2 (PR<sub>AS</sub>)

MQAIPPVARGESPTPSFGQRNERESKNASSSEESPRFYPRLPAAEPQTATRQDAASSLTHSPPP  
APPPRAQAPQPQPRPGPAPGPAPTTPRPRPRPRPRPRPRPR (PR)<sub>EXP</sub>PRPRPLARDS\*

Antisense frame 3 (GP<sub>AS</sub>)

MRGKVKMRRALRRAPASTRASSRQPNPKQPPARMPPPHSPTRHRLRLRRRGRHRNRSPAGPPP  
GPPRRRPGPGPGPGPGPGPGPGP (GP)<sub>EXP</sub>GPGP\*

**Fig. S3.** Putative protein products in sense and antisense directions for all six reading frames. Repeat motifs are highlighted in red. Peptides used to generate polyclonal antibodies to the various repeat motifs or unique C-terminal flanking sequences are underlined. Possible upstream AUG start sites (M) are shown in red for antisense frame 2 and frame 3. Stop codons are indicated by an asterisk.

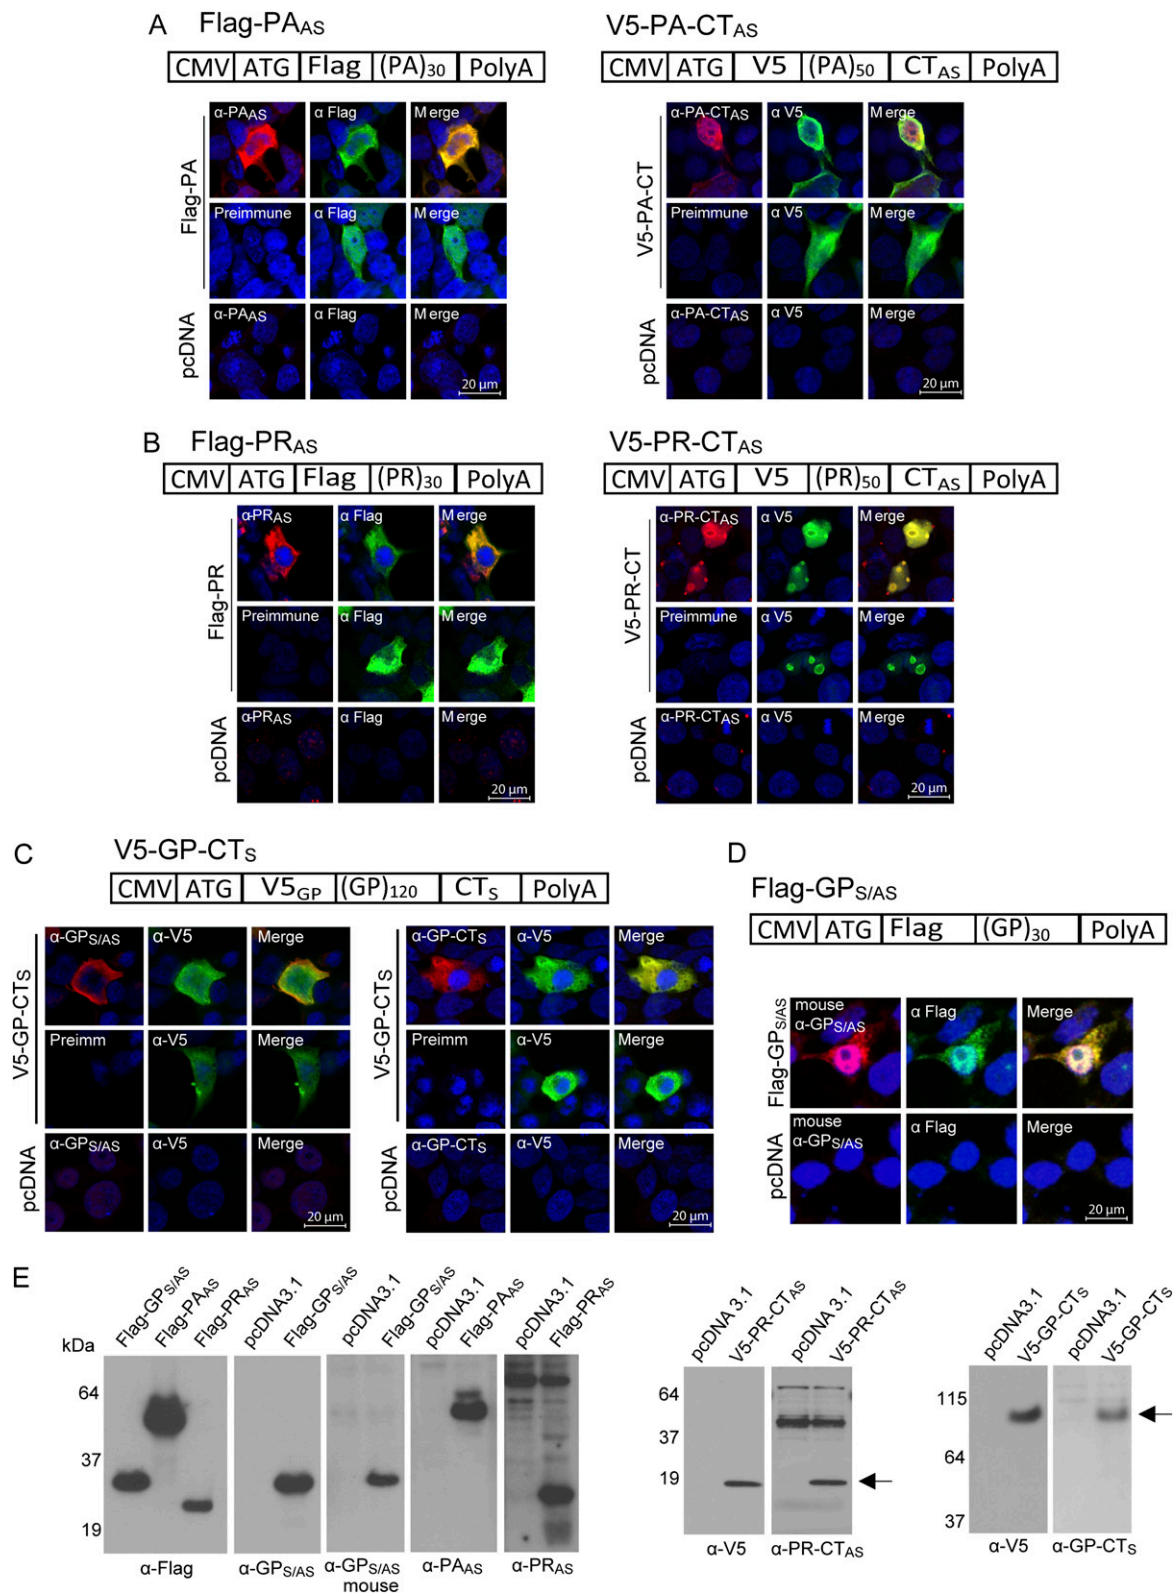

**Fig. S4.** Validation of dual antibodies to detect putative polyPA, polyPR, and polyGP proteins by immunofluorescence (IF) and protein blot. (A–D, Upper) Schematic diagrams of constructs expressing ATG-initiated N-terminal epitope-tagged (V5 or Flag) repeat proteins with or without endogenous C-terminal sequences. (A–D, Lower) Colocalization of  $\alpha$ -Flag or  $\alpha$ -V5 (green) staining in transfected HEK293T cells with staining (red) using the following newly developed antibodies: (A)  $\alpha$ -PA<sub>AS</sub> or  $\alpha$ -PA-CT<sub>AS</sub>; (B)  $\alpha$ -PR<sub>AS</sub> or  $\alpha$ -PR-CT<sub>AS</sub>; (C) rabbit  $\alpha$ -GP<sub>S/AS</sub> or  $\alpha$ -GP-CT<sub>S</sub>; (D) mouse  $\alpha$ -GP<sub>S/AS</sub>. Similar staining was not seen in preimmune or pcDNA3.1 empty vector controls. (E) Corresponding immunoblots showing six of the seven antibodies tested also detect recombinant proteins by Western blot.

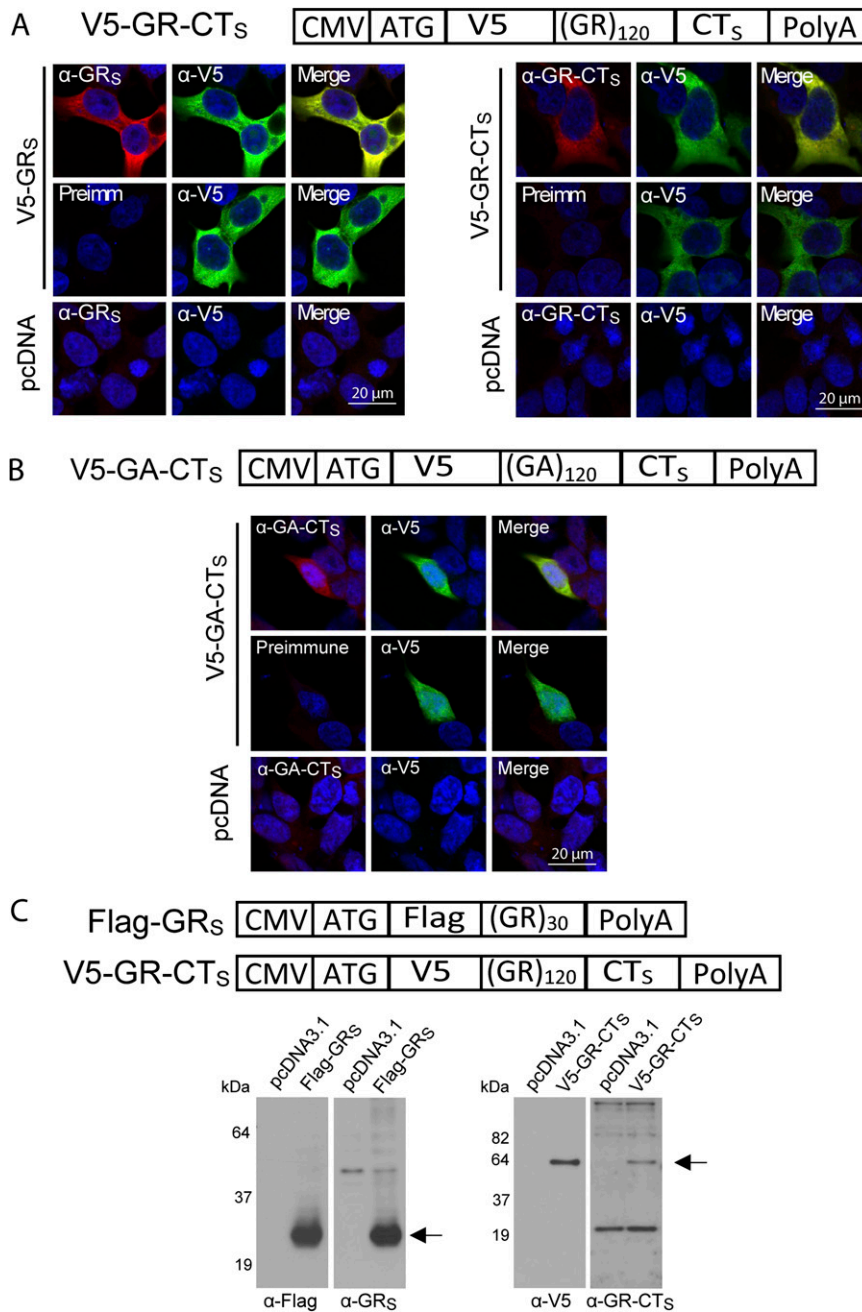

**Fig. S5.** Validation of additional sense repeat and C-terminal polyclonal antibodies. (A and B, Upper) Schematic diagrams of constructs expressing ATG-initiated N-terminal V5-epitope tagged GR or GA repeat proteins with endogenous C-terminal sequences in the sense (s) direction (V5-GR-CT<sub>s</sub> and V5-GA-CT<sub>s</sub>). (A and B, Lower) Colocalization of  $\alpha$ -V5 (green) staining in transfected HEK293T cells with  $\alpha$ -GR<sub>s</sub>,  $\alpha$ -GR-CT<sub>s</sub>, and  $\alpha$ -GA-CT<sub>s</sub>, respectively. Similar staining was not seen in corresponding preimmune or pcDNA3.1 empty vector controls. (C) Immunoblots showing novel  $\alpha$ -GR<sub>s</sub> and  $\alpha$ -GR-CT<sub>s</sub> antibodies detect recombinant protein (indicated by arrows) in Flag-GR<sub>s</sub> transfected cells by protein blot.

A  
 S-(G<sub>4</sub>C<sub>2</sub>)<sub>EXP</sub>-3T [CMV|6xStop| (GGGGCC)<sub>EXP</sub>|Flag(GP)-HA(GR)-Myc(GA)|polyA]

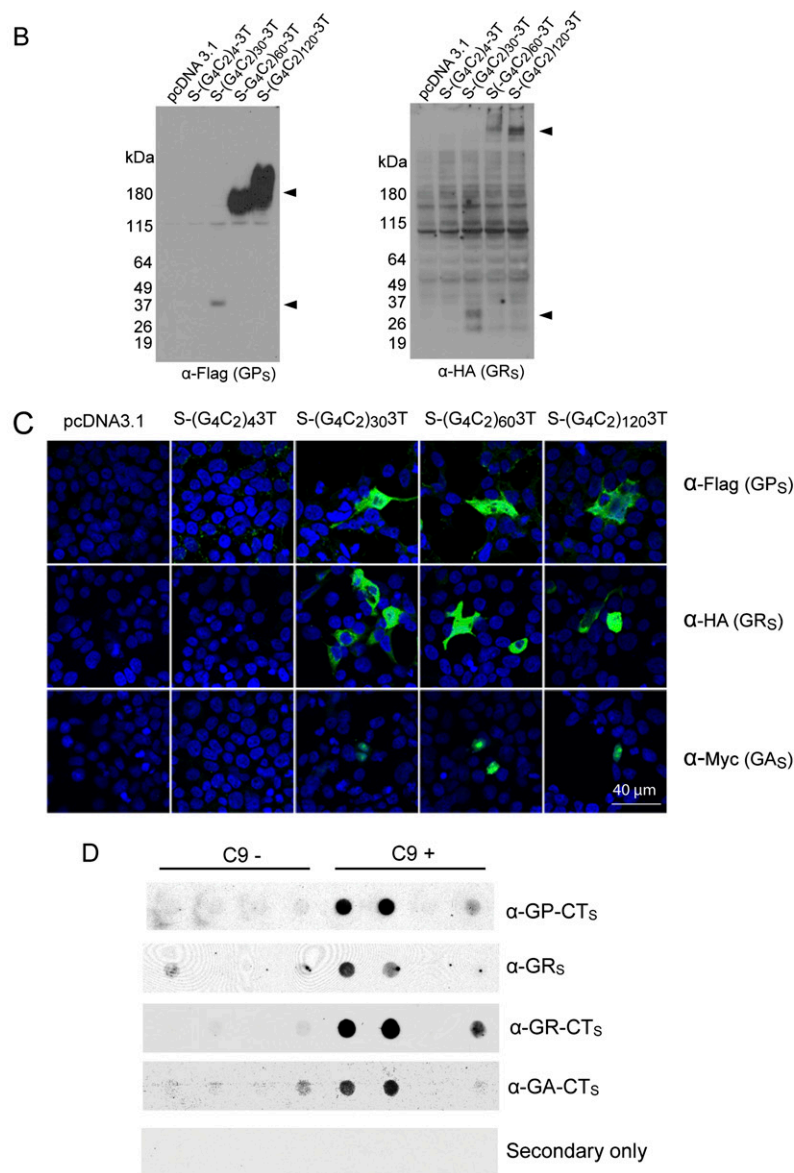

**Fig. S6.** In vitro and in vivo evidence for repeat-associated non-ATG (RAN) translation of the sense GGGGCC repeat expansion. (A) Constructs containing varying GGGGCC repeat lengths with upstream 6xStop cassette and 3' epitope tags in each reading frame. Immunoblots (B) probed with  $\alpha$ -Flag or  $\alpha$ -HA antibodies detect RAN proteins (indicated by arrowheads). IF staining (C) showing RAN translation occurs in all three frames (GP<sub>S</sub>, GR<sub>S</sub>, GA<sub>S</sub>) in cells transfected with constructs containing 30, 60, and 120 repeats. (D) Immunoblots of 2% soluble lysates from C9(+) and C9(-) amyotrophic lateral sclerosis (ALS) FCX lysates with antibodies against sense RAN proteins. Dot blots containing frontal cortex lysates from four different C9(-) and four different C9(+) ALS/frontotemporal dementia (FTD) patients were probed with  $\alpha$ -GP-CT<sub>S</sub>,  $\alpha$ -GR<sub>S</sub>,  $\alpha$ -GR-CT<sub>S</sub>, and  $\alpha$ -GA<sub>S</sub> antibodies. Results show evidence of RAN protein accumulation with all four antibodies in two of four C9(+) samples and weaker positive staining in one sample with  $\alpha$ -GP-CT<sub>S</sub> and  $\alpha$ -GR-CT<sub>S</sub>.

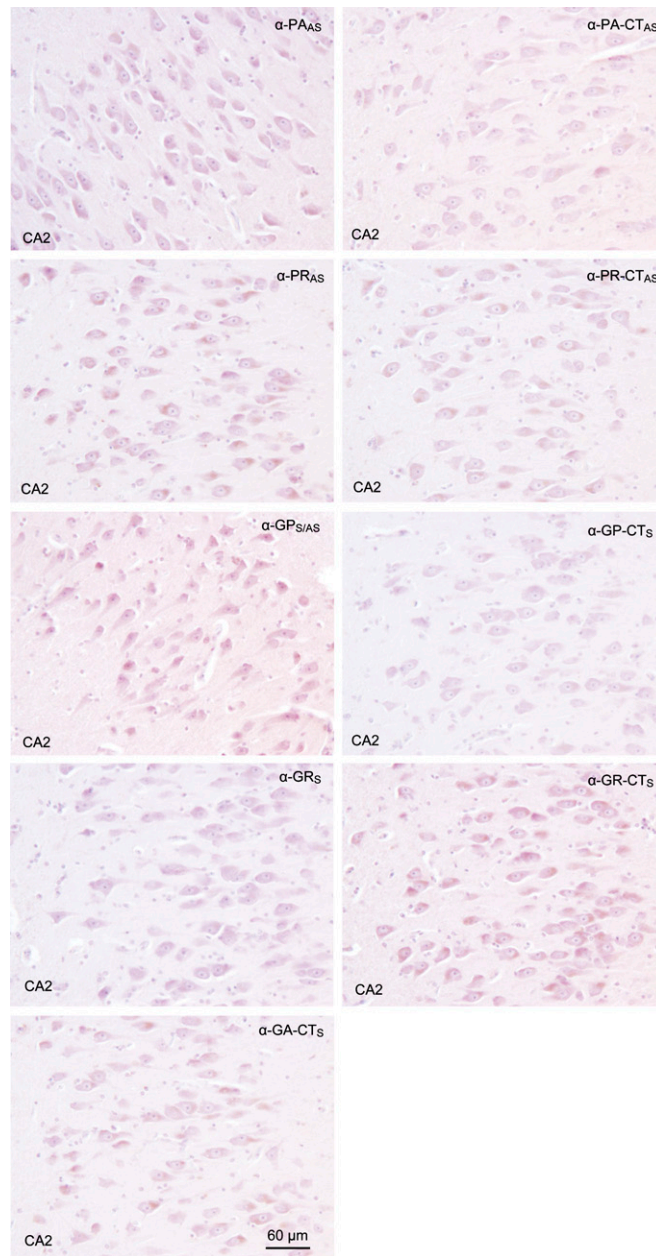

Fig. S7. Examples of negative IHC staining of C9(-) ALS/FTD hippocampal sections from cornu ammonis region 2 (CA2). Antibodies against sense and antisense RAN proteins are indicated.

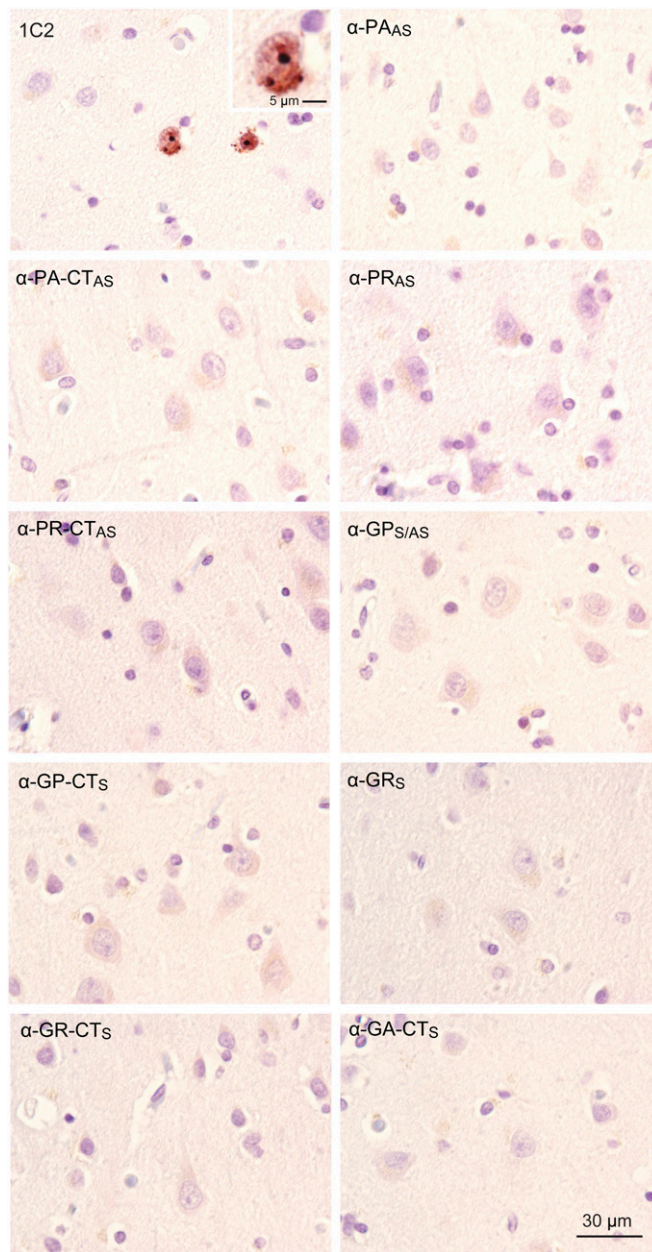

**Fig. S8.** Antibody validation. Intracellular inclusions in frontal cortex of Huntington disease were detected by antipolyglutamine antibody (1C2); (*Inset*) higher-power image. No similar staining was found using any of the nine C9 antisense and sense antibodies.



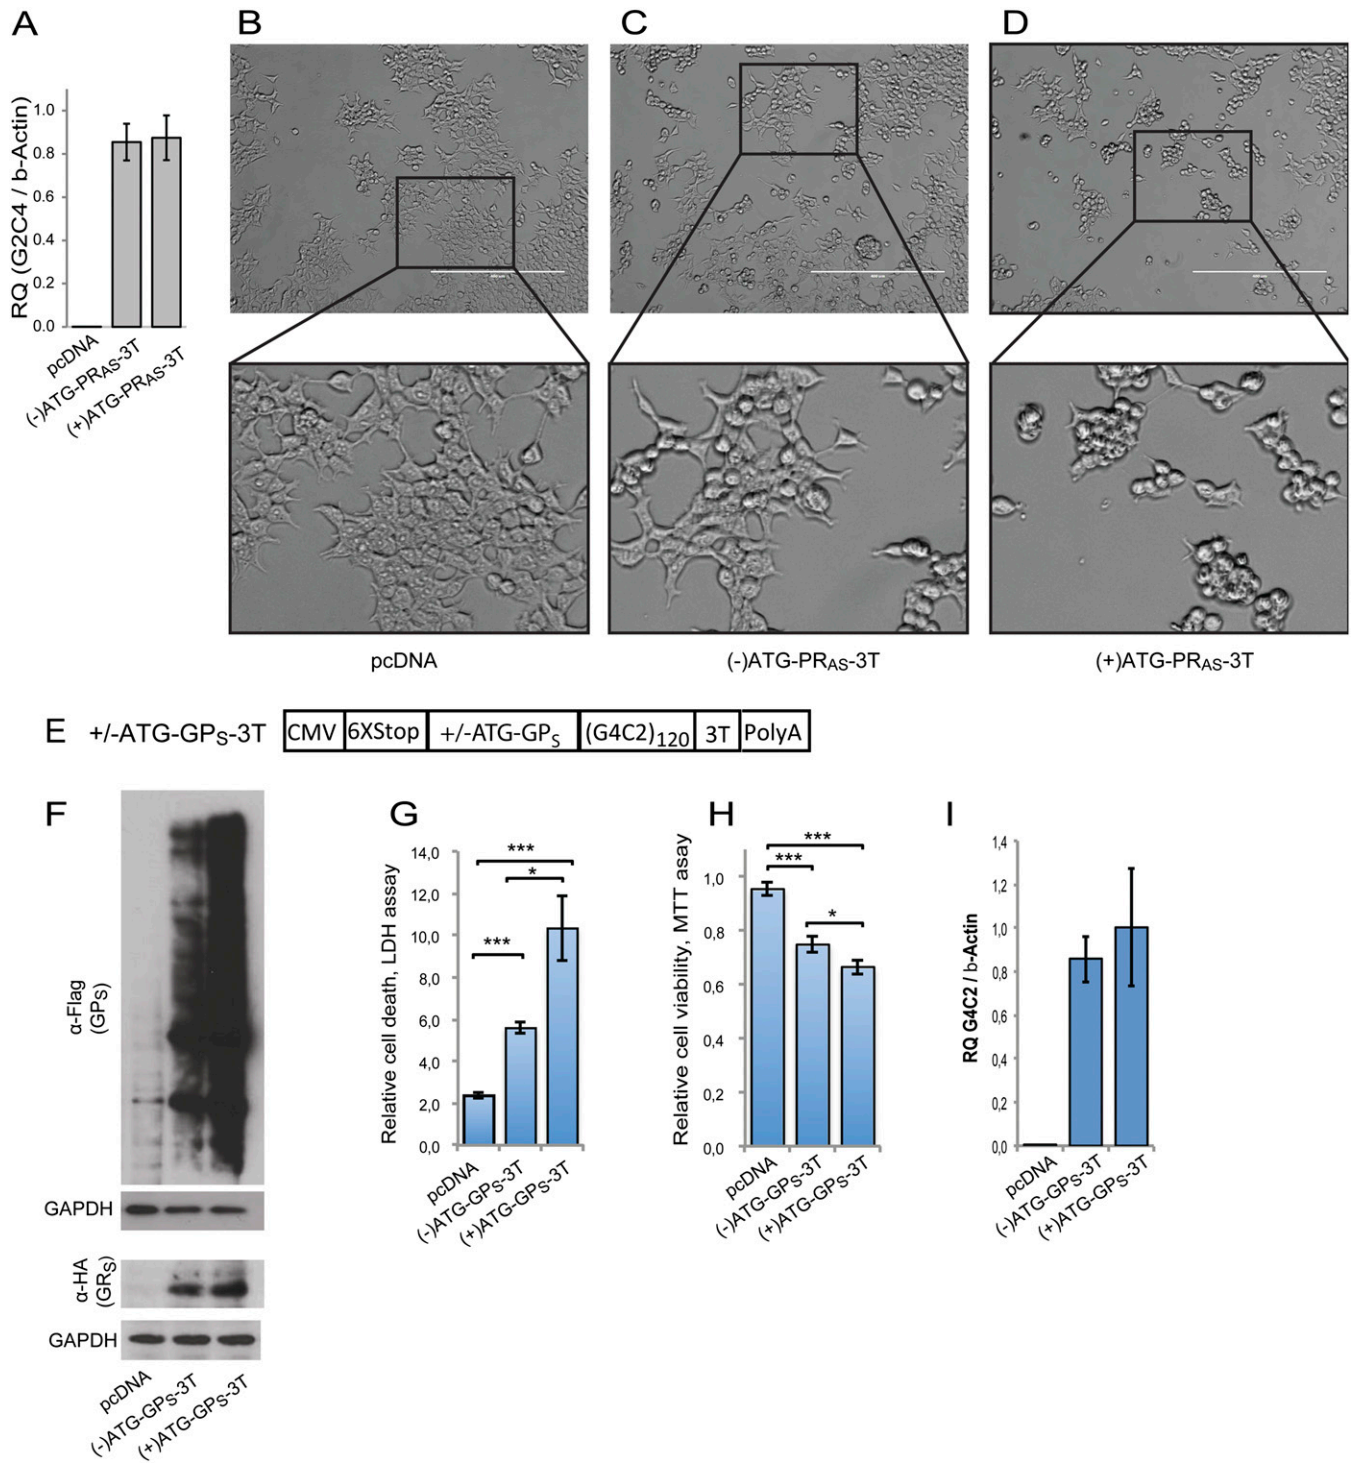

**Fig. S9.** RAN translation and PR<sub>AS</sub> and GP<sub>5</sub> protein expression affect cell viability. (A) Quantitative RT-PCR shows expression of expansion transcripts are similar in HEK293T cells transfected with (-)ATG-PR<sub>AS</sub>-3T and (+)ATG-PR<sub>AS</sub>-3T constructs. (B–D) Bright-field microscopy images showing changes in cell morphology in cells expressing RNA and RAN proteins from (-)ATG-PR<sub>AS</sub>-3T constructs compared with empty vector control (pcDNA3.1) and worsening effects in (+)ATG-PR<sub>AS</sub>-3T cells expressing increased levels of PR protein. (E–I) RAN and GP<sub>5</sub> toxicity studies. (E) Schematic diagram of G<sub>4</sub>C<sub>2</sub> expansion constructs (+/-ATG-GP<sub>5</sub>-3T) with and without an ATG initiation codon in GP<sub>5</sub> frame and 3' epitope tags. (F) Protein blots showing levels of PR and GP in cells transfected with constructs in E. (G) Lactate dehydrogenase (LDH) ( $n = 9$  independent experiments) and (H) methylthiazol tetrazolium (MTT) assays ( $n = 10$  independent experiments) of transfected HEK293T cells. (I) Quantitative RT-PCR showing cells transfected with +ATG-GP<sub>5</sub>-3T and -ATG-GP<sub>5</sub>-3T constructs express comparable levels of RNA. \* $P \leq 0.05$ , \*\* $P \leq 0.01$ , \*\*\* $P \leq 0.001$ .

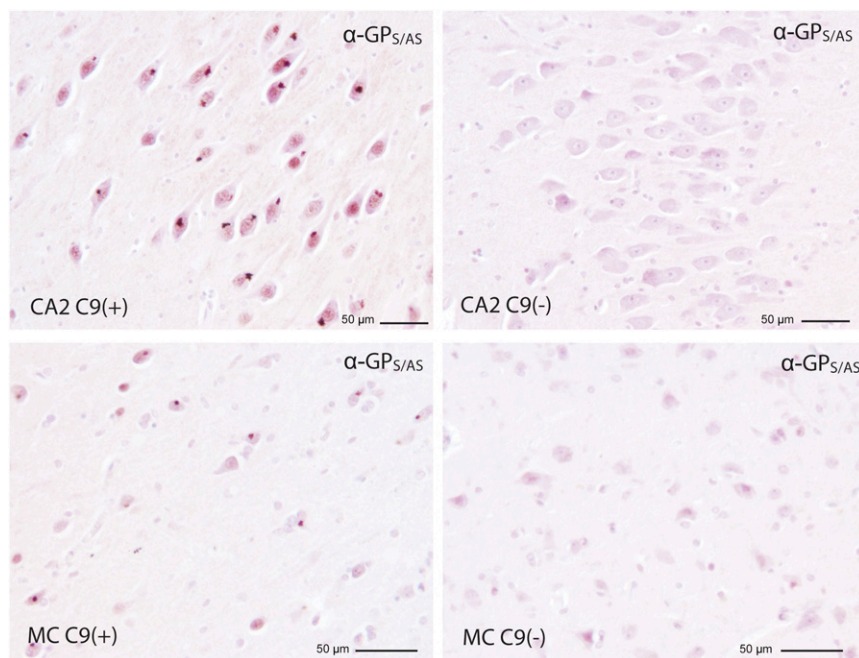

**Fig. S10.** Clustered GP-RAN protein aggregates in hippocampus and motor cortex. Low-power images of IHC staining with  $\alpha$ -GP<sub>S/AS</sub> show GP<sub>S/AS</sub> aggregates in ALS/FTD C9(+) cornu ammonis region 2 (CA2) and motor cortex (MC) autopsy samples, but not in ALS/FTD C9(-) control tissue.

**Table S1. Antibody validation summary**

| Strand                           | Antigen   | ID #  | Sequence                     | Species | IB | IHC | IF |
|----------------------------------|-----------|-------|------------------------------|---------|----|-----|----|
| AS-G <sub>2</sub> C <sub>4</sub> | poly(PA)  | H3152 | H2N-APAPAPAPAPAPACKKKK-amide | Rabbit  | Y  | Y   | Y  |
|                                  | PA C-term | H3159 | Ac-CYRLRLFPRLFSSG-OH         | Rabbit  | N  | Y   | Y  |
|                                  | poly(PR)  | H3150 | Ac-RPRPRPRPRPRPRPRPC-amide   | Rabbit  | Y  | Y   | Y  |
|                                  | PR C-term | H3162 | Ac-CRPRPLARDS-OH             | Rabbit  | Y  | Y   | Y  |
| Both strands                     | poly(GP)  | H3154 | H2N-GPGPGPGPGPGPGPGCKK-amide | Rabbit  | Y  | Y   | Y  |
|                                  | poly(GP)  | F3M1  | H2N-GPGPGPGPGPGPGPGCKK-amide | Mouse   | Y  | Y   | Y  |
| S-G <sub>4</sub> C <sub>2</sub>  | GP C-term | H3157 | Ac-CRRRRWRVGE-OH             | Rabbit  | Y  | Y   | Y  |
|                                  | poly(GR)  | H3148 | Ac-RGRGRGRGRGRGRGRRC-amide   | Rabbit  | Y  | Y   | Y  |
|                                  | GR C-term | H3160 | Ac-CRVAVWGSAAAGKRRG-OH       | Rabbit  | Y  | Y   | Y  |
|                                  | GA C-term | H3164 | Ac-CSGRARGRARGGA-amide       | Rabbit  | N  | Y   | Y  |

IB, immunoblotting; IF, immunofluorescence; IHC, immunohistochemistry.

**Table S2. Primer sequences**

| Primer name | Primer sequence (5' to 3')                  |
|-------------|---------------------------------------------|
| ASORF-F     | AGTCGCTAGAGGCGAAAGC                         |
| ASORF-R     | CGAGTGGGTGAGTGAGGAG                         |
| LK-ASORF-R  | CGACTGGAGCACGAGGACACTGACGAGTGGGTGAGTGAGGAG  |
| LK-ASORF-F  | CGACTGGAGCACGAGGACACTGAAGTCGCTAGAGGCGAAAGC  |
| 1a-F        | GCCCACGTAAAAGATGACGC                        |
| 1a-R        | CCTCCTAAACCCACACCTGC                        |
| LK-1a-R     | CGACTGGAGCACGAGGACACTGACCTCCTAAACCCACACCTGC |
| LK-1a-F     | CGACTGGAGCACGAGGACACTGAGCCCACGTAAAAGATGACGC |
| LK          | CGACTGGAGCACGAGGACACTGA                     |
| 5' GSP1     | GCTTTCGCCTCTAGCGACT                         |
| 5' GSP2     | TCTAGCGACTGGTGAATTGCCT                      |
| 3' GSP1     | CTGCGGTTGTTTCCCTCCTT                        |
| 3' GSP2     | TTTCTGTTCACCTCAGCGA                         |
| ACTB3       | CTGGAACGGTGAAGGTGACA                        |
| ACTB4       | GGGAGAGGACTGGGCCATT                         |
| 3xTag-Fw    | ACGACATCGATTACAAGGACG                       |
| 3xTag-RV    | ATCAGCTTCTGCTCGCTATG                        |
